# Supplementary material for: Excess centrosomes disrupt vascular lumenization and endothelial cell adherens junctions
Source: Springer Nature journal article supplement (doi:10.1007/s10456-020-09737-7), 2020-07-22
Supplement: MOESM1 [file 18205808]

## SUPPLEMENTARY MATERIAL

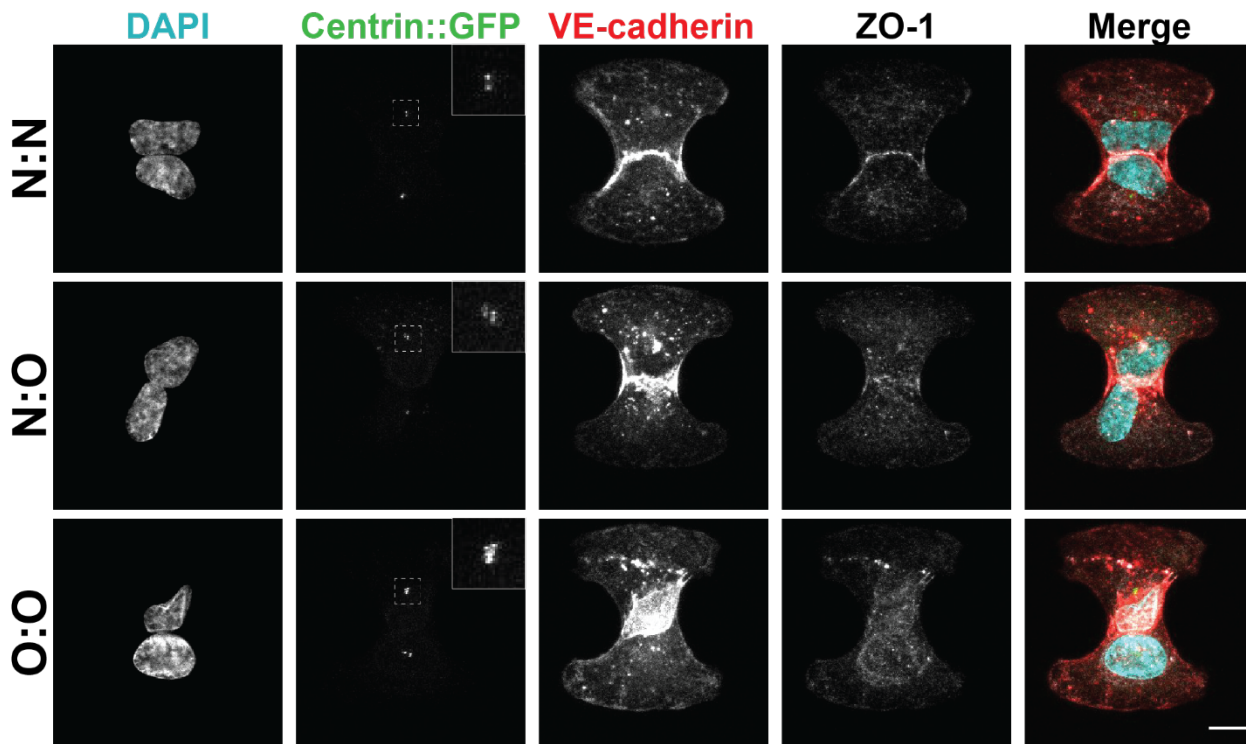**Supplementary Figure 1. EC with excess centrosomes do not form proper tight junctions.**

Representative images of micropatterns with N:N, N:O, or O:O configurations. EC were labeled for DNA (cyan, DAPI), centrosomes (green, centrin::GFP), adherens junctions (VE-cadherin, red), and tight junctions (ZO-1, gray). Insets, centrin-GFP. Scale bar, 10 $\mu$ m.

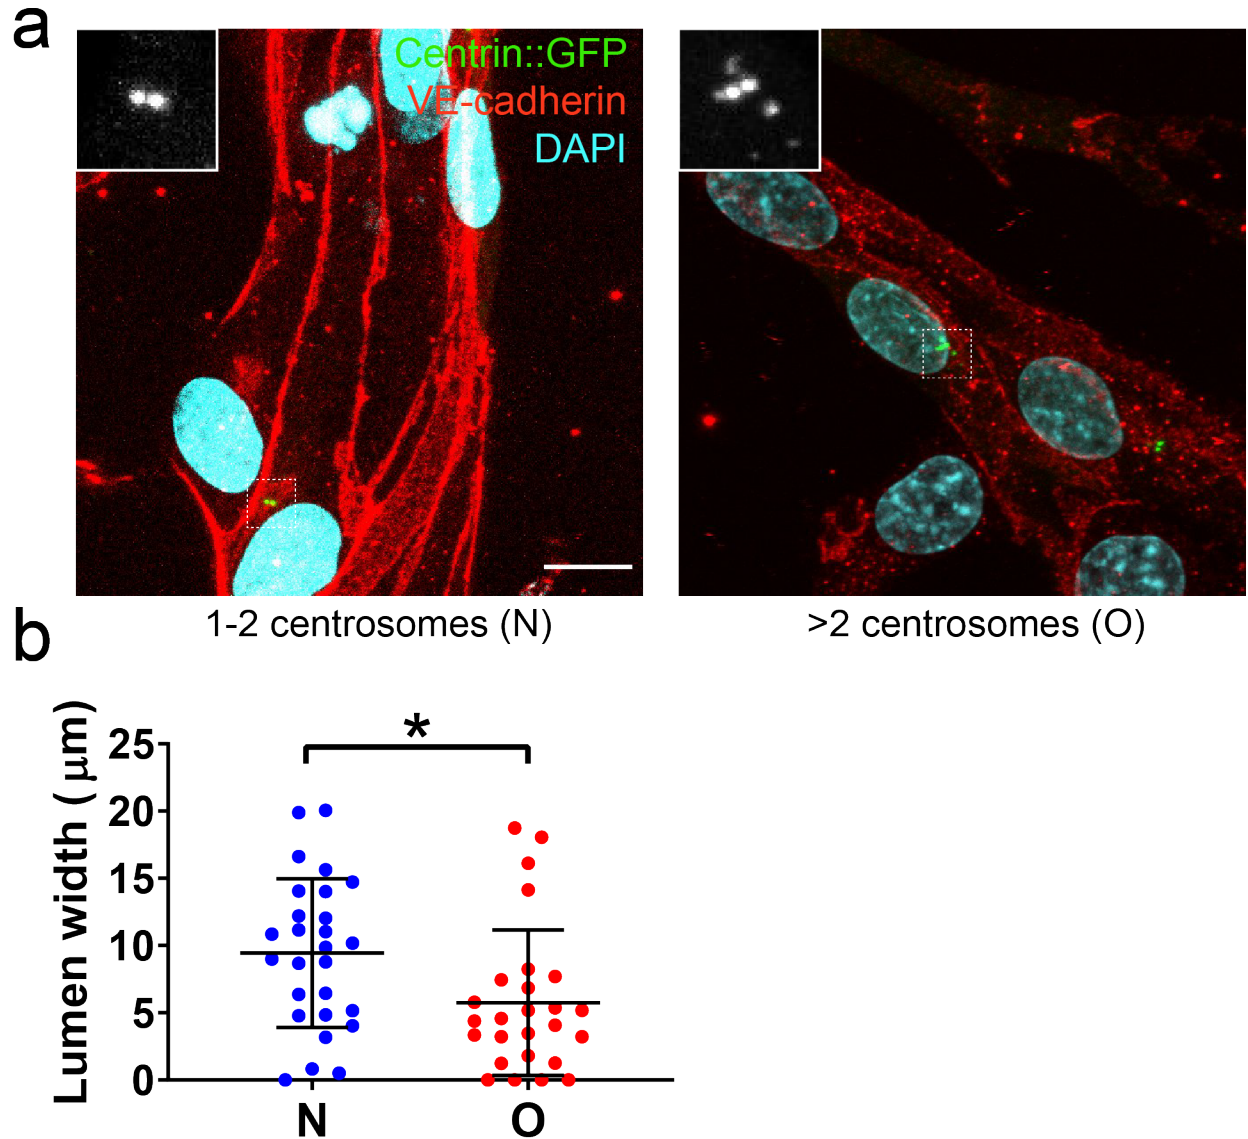

**Supplementary Figure 2. EC with excess centrosomes have disrupted junctions and lumens in 3D sprouts.**

**(a)** Representative images of 3D sprouts showing junctions in EC with indicated centrosome number. EC are labeled for DNA (cyan, DAPI), centrosomes (green, centrin::GFP), and adherens junctions (VE-cadherin, red). Insets, centrin-GFP. Scale bar, 10  $\mu\text{m}$ . **(b)** Quantification of raw lumen width (not normalized to vessel width). n=3 replicates. Statistics: one-way ANOVA with Tukey's correction.

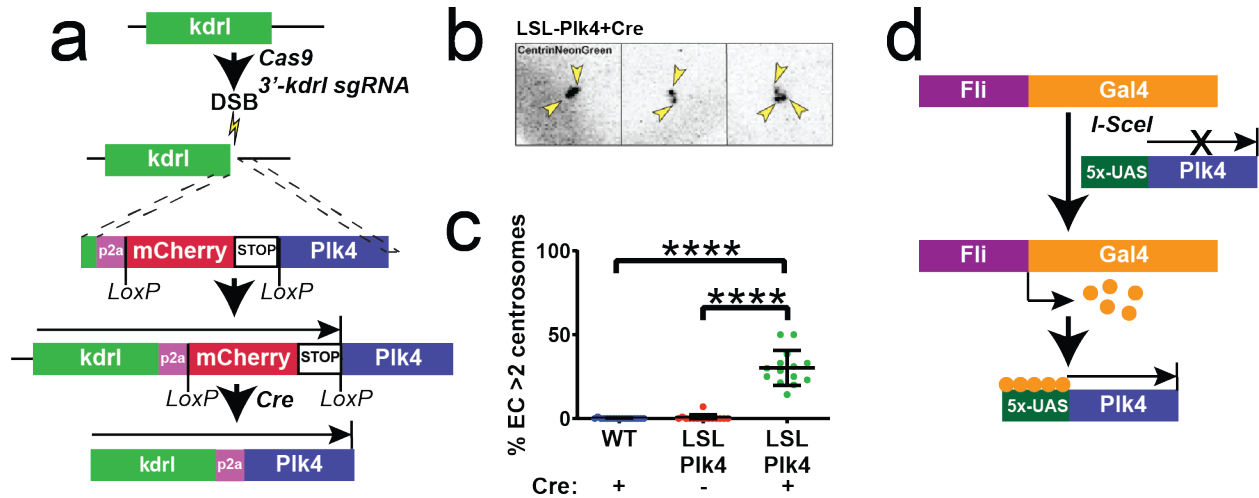

**Supplementary Figure 3. *Plk4* overexpression in zebrafish leads to excess centrosomes.**

**(a)** Schematic for Cre-mediated *Plk4* overexpression in zebrafish. **(b)** Representative image of *Plk4* overexpression in 72 hpf zebrafish. Yellow arrowheads, EC centrosome number. **(c)** Quantification of EC with >2 centrosomes in zebrafish with indicated genotypes/conditions (WT + Cre, n=17 fish; LSL-*Plk4* uninjected, n=15; LSL-*Plk4* + Cre, n=14). Statistics: one-way ANOVA with Tukey's correction. \*\*\*\*,  $p \leq 0.0001$ . **(d)** Schematic for transient *Gal4*-UAS mediated overexpression of *Plk4* in zebrafish.
